# Supplementary material
Source: bioRxiv or medRxiv preprint supplement (https://www.biorxiv.org/highwire/filestream/69036/field_highwire_adjunct_files/4/216754-13.pdf)
Supplement: Supplementary file [file 216754-13.pdf]

Supplementary Table 4: Description of the pancancer AMARETTO communities

|              | BLCA | BRCA | COADREAD | GBM | HNSC | KIRC | LAML | LUAD | LUSC | OV | UCEC | Total number of modules |
|--------------|------|------|----------|-----|------|------|------|------|------|----|------|-------------------------|
| Community 1  | 9    | 9    | 7        | 4   | 8    | 10   | 0    | 8    | 9    | 1  | 9    | 74                      |
| Community 2  | 6    | 4    | 8        | 9   | 8    | 7    | 9    | 5    | 7    | 5  | 5    | 73                      |
| Community 3  | 9    | 7    | 9        | 5   | 7    | 5    | 1    | 4    | 5    | 7  | 5    | 64                      |
| Community 4  | 9    | 5    | 3        | 0   | 10   | 3    | 0    | 6    | 9    | 5  | 5    | 55                      |
| Community 5  | 3    | 5    | 7        | 3   | 6    | 3    | 0    | 8    | 9    | 1  | 6    | 51                      |
| Community 6  | 4    | 8    | 5        | 3   | 3    | 8    | 2    | 4    | 4    | 2  | 5    | 48                      |
| Community 7  | 4    | 7    | 5        | 1   | 6    | 3    | 5    | 6    | 4    | 2  | 2    | 45                      |
| Community 8  | 2    | 3    | 1        | 4   | 2    | 3    | 1    | 3    | 1    | 3  | 5    | 28                      |
| Community 9  | 2    | 2    | 2        | 0   | 3    | 2    | 0    | 9    | 4    | 0  | 3    | 27                      |
| Community 10 | 2    | 0    | 2        | 2   | 2    | 1    | 1    | 1    | 3    | 2  | 2    | 20                      |
| Community 11 | 2    | 1    | 2        | 1   | 2    | 1    | 1    | 1    | 2    | 1  | 2    | 16                      |
| Community 12 | 1    | 2    | 1        | 1   | 2    | 0    | 1    | 2    | 2    | 1  | 2    | 15                      |
| Community 13 | 2    | 1    | 1        | 0   | 3    | 0    | 0    | 2    | 3    | 1  | 2    | 15                      |
| Community 14 | 2    | 1    | 1        | 2   | 3    | 0    | 1    | 1    | 1    | 2  | 1    | 15                      |
| Community 15 | 3    | 2    | 0        | 0   | 2    | 0    | 0    | 3    | 1    | 1  | 1    | 13                      |
| Community 16 | 1    | 1    | 2        | 0   | 2    | 1    | 1    | 1    | 1    | 1  | 1    | 12                      |
| Community 17 | 1    | 1    | 1        | 1   | 1    | 1    | 1    | 1    | 1    | 1  | 1    | 11                      |
| Community 18 | 2    | 0    | 0        | 2   | 0    | 1    | 1    | 1    | 0    | 3  | 0    | 10                      |
| Community 19 | 1    | 1    | 0        | 0   | 3    | 1    | 0    | 0    | 1    | 1  | 1    | 9                       |
| Community 20 | 0    | 1    | 0        | 2   | 1    | 0    | 1    | 1    | 1    | 1  | 1    | 9                       |
